# Supplementary material for: LiTi2(PO4)3/reduced graphene oxide nanocomposite with enhanced electrochemical performance for lithium-ion batteries
Source: Royal Society of Chemistry journal article supplement (doi:10.1039/c4ra04943h), 2014-01-01
Supplement: c4ra04943h1.pdf [file c4ra04943h1.pdf]

## **Electronic Supplementary Information (ESI)**

### **LiTi<sub>2</sub>(PO<sub>4</sub>)<sub>3</sub>/reduced graphene oxide nanocomposite with enhanced electrochemical performance for lithium-ion batteries**

Ha-Kyung Roh,<sup>a</sup> Hyun-Kyung Kim,<sup>a</sup> Kwang Chul Roh,<sup>\*b</sup> and Kwang-Bum Kim<sup>\*a</sup>

<sup>a</sup> *Department of Materials Science & Engineering, Yonsei University, 50 Yonsei-ro, Seodaemun-gu, Seoul 120-749, Republic of Korea. E-mail: kbkim@yonsei.ac.kr*

<sup>b</sup> *Energy Efficient Materials Team, Energy & Environmental Division, Korea Institute of Ceramic Engineering & Technology, 233-5 Gasan-dong, Gueemcheon-gu, Seoul 153-801, Republic of Korea. E-mail: rkc@kicet.re.kr*

**Supplementary Table**

|                                                        | wt.% of elements from elemental analysis |          |          |
|--------------------------------------------------------|------------------------------------------|----------|----------|
| LiTi <sub>2</sub> (PO <sub>4</sub> ) <sub>3</sub> /rGO | Carbon                                   | Hydrogen | Nitrogen |
|                                                        | 24.1                                     | 0.02     | 0.73     |

**Table S1.** CHNS elemental analysis of the LiTi<sub>2</sub>(PO<sub>4</sub>)<sub>3</sub>/rGO nanocomposite.

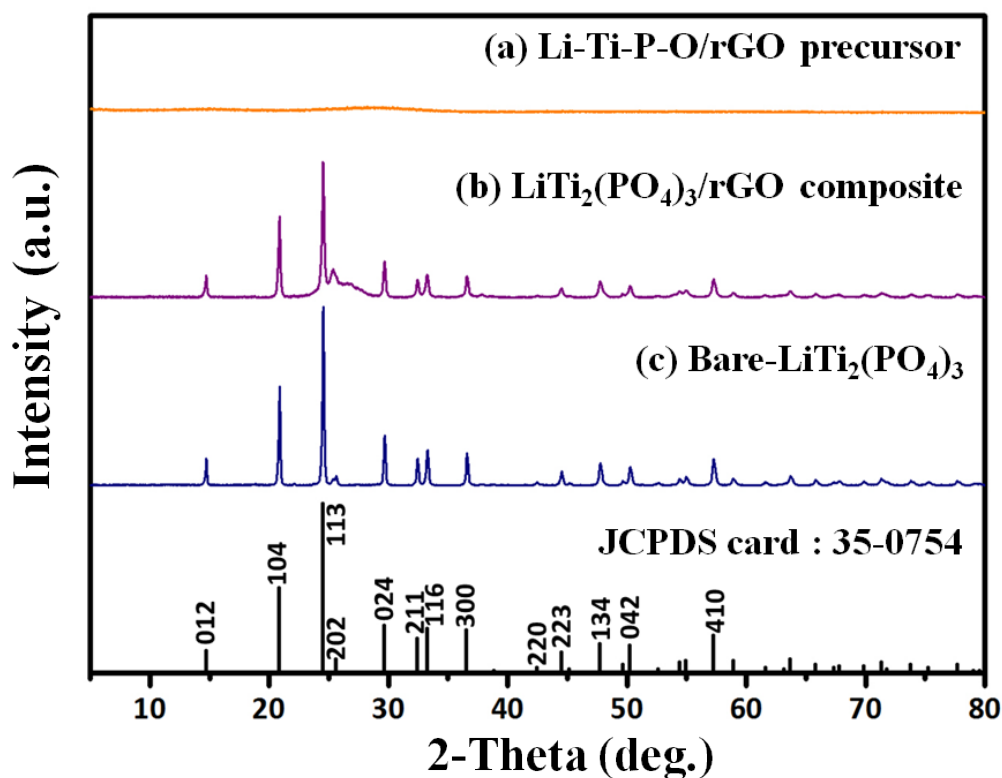

**Figure S1.** X -ray diffraction patterns of (a) the amorphous phase of the Li–Ti–P–O/rGO precursor, (b) the  $\text{LiTi}_2(\text{PO}_4)_3/\text{rGO}$  nanocomposite, (c) the bare  $\text{LiTi}_2(\text{PO}_4)_3$  prepared by the Pechini sol-gel method. Both the  $\text{LiTi}_2(\text{PO}_4)_3$  samples, prepared either by the microwave-assisted solvothermal method or the Pechini sol-gel method, were phase-pure according to their XRD patterns. The XRD patterns corresponding to standard NASICON-structured  $\text{LiTi}_2(\text{PO}_4)_3$  (JCPDS card no. 35-0754) are provided for reference.<sup>1-4</sup>

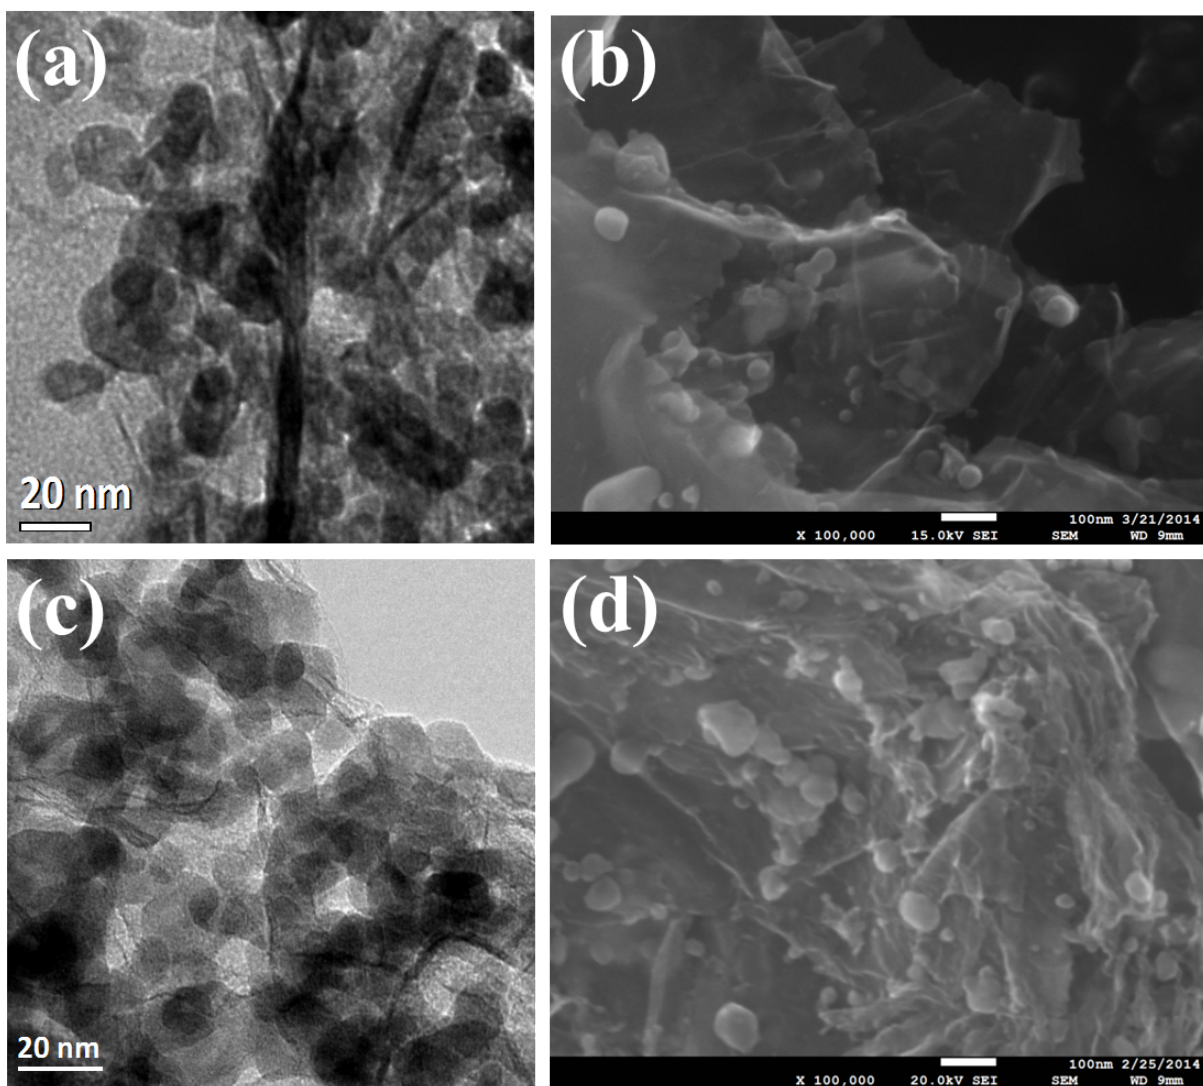

**Figure S2.** (a) TEM and (b) SEM images of the Li-Ti-P-O/rGO precursor and (c) TEM and (d) SEM images of the LiTi<sub>2</sub>(PO<sub>4</sub>)<sub>3</sub> nanoparticles after calcination. Both before and after calcination, LiTi<sub>2</sub>(PO<sub>4</sub>)<sub>3</sub> nanoparticles with a narrow size distribution of ~40 nm are firmly anchored on the rGO surface with no indication of morphological changes.

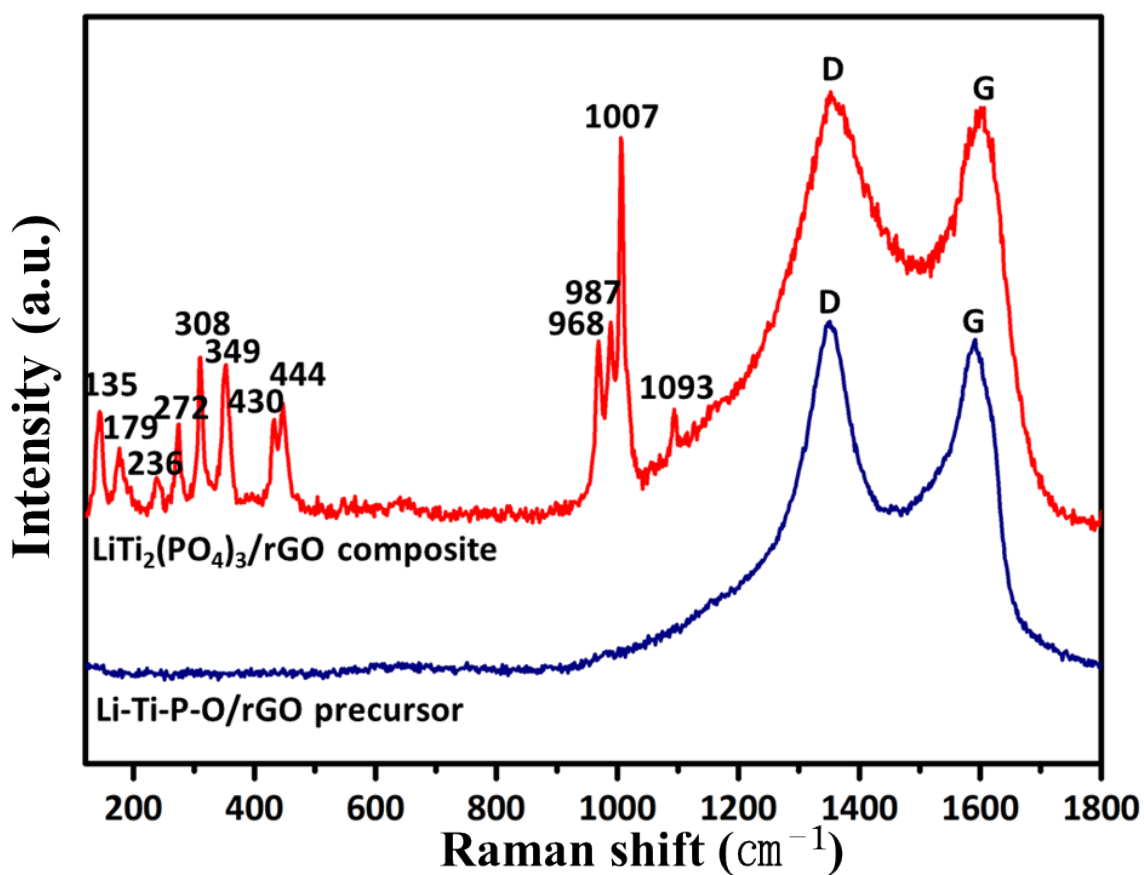

**Figure S3.** Raman spectrum of  $\text{LiTi}_2(\text{PO}_4)_3$  in the  $\text{LiTi}_2(\text{PO}_4)_3/\text{rGO}$  nanocomposite. The Raman spectrum showed four characteristic peaks at 968, 987, 1007 and 1093  $\text{cm}^{-1}$ . The bands at 135, 272  $\text{cm}^{-1}$  are assigned to translational vibrations of the  $\text{Ti}^{4+}$  ions, while the bands at 179, 236, 308, 349, 430, 444  $\text{cm}^{-1}$  are assigned to modes that are predominantly associated with  $(\text{PO}_4)^{3-}$  motions. These Raman-allowed phonon peaks are the fingerprints of the NASICON-structure, which confirm the formation of phase-pure NASICON-structured  $\text{LiTi}_2(\text{PO}_4)_3$  in the nanocomposite. The Raman spectra corresponding to standard  $\text{LiTi}_2(\text{PO}_4)_3$  are provided for reference.<sup>5-7</sup>

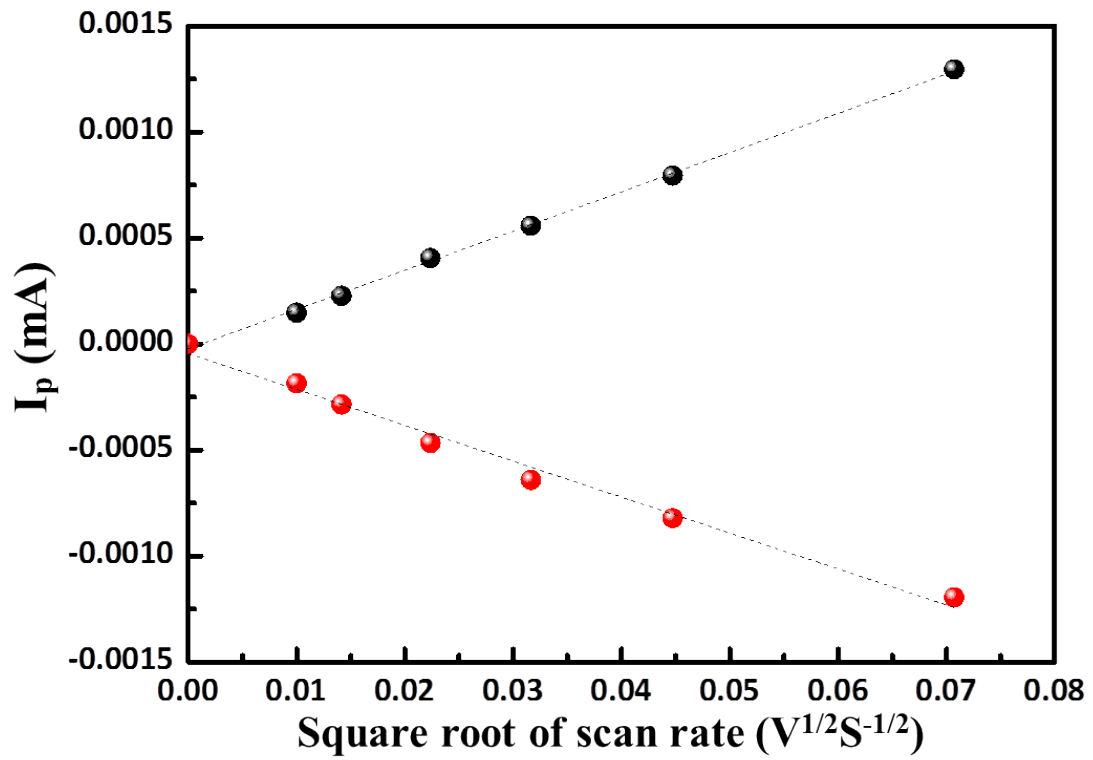

**Figure S4.** Linear plot of the relationship between the peak current ( $I_p$ ) and the square root of the scan rate ( $v^{1/2}$ ) for both the anodic and cathodic scans of  $LiTi_2(PO_4)_3/rGO$  nanocomposite.

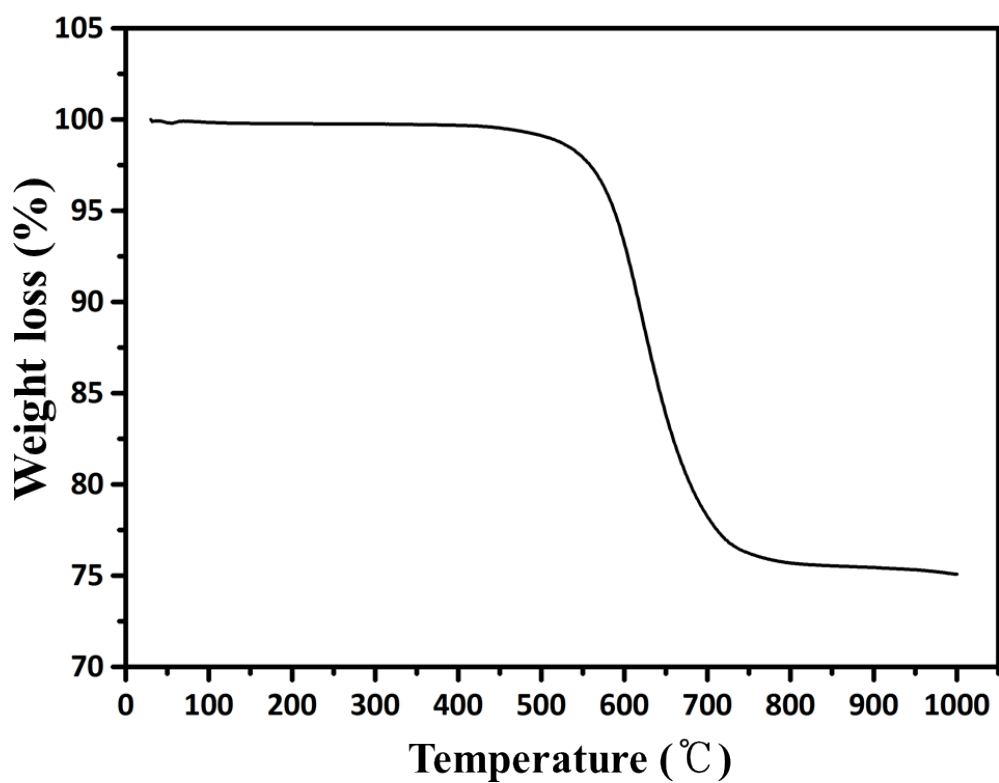

**Figure S5.** TGA plots of the  $\text{LiTi}_2(\text{PO}_4)_3/\text{rGO}$  nanocomposite, heated at  $10\text{ }^{\circ}\text{C min}^{-1}$  from room temperature to  $1000\text{ }^{\circ}\text{C}$  under air flow. From these thermogravimetric data, the loading of  $\text{LiTi}_2(\text{PO}_4)_3$  in the  $\text{LiTi}_2(\text{PO}_4)_3/\text{rGO}$  nanocomposite was determined to be 75 wt%.

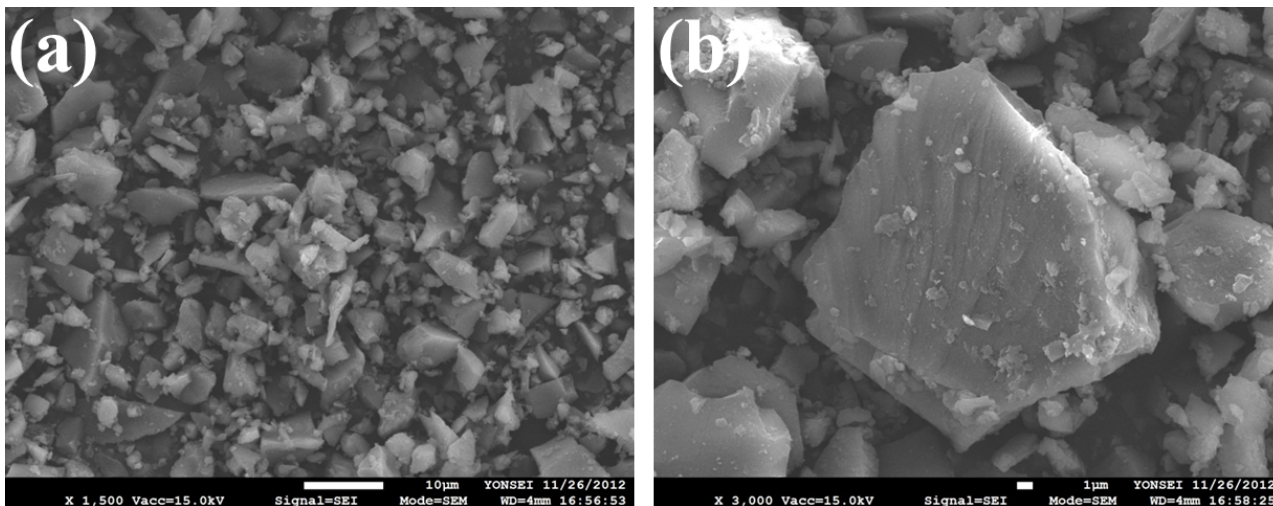

**Figure S6.** SEM images of bare  $\text{LiTi}_2(\text{PO}_4)_3$  prepared by the Pechini method. The resulting bare  $\text{LiTi}_2(\text{PO}_4)_3$  particles are mostly of submicron sizes, and few micron-sized particles have agglomerated in the absence of rGO.



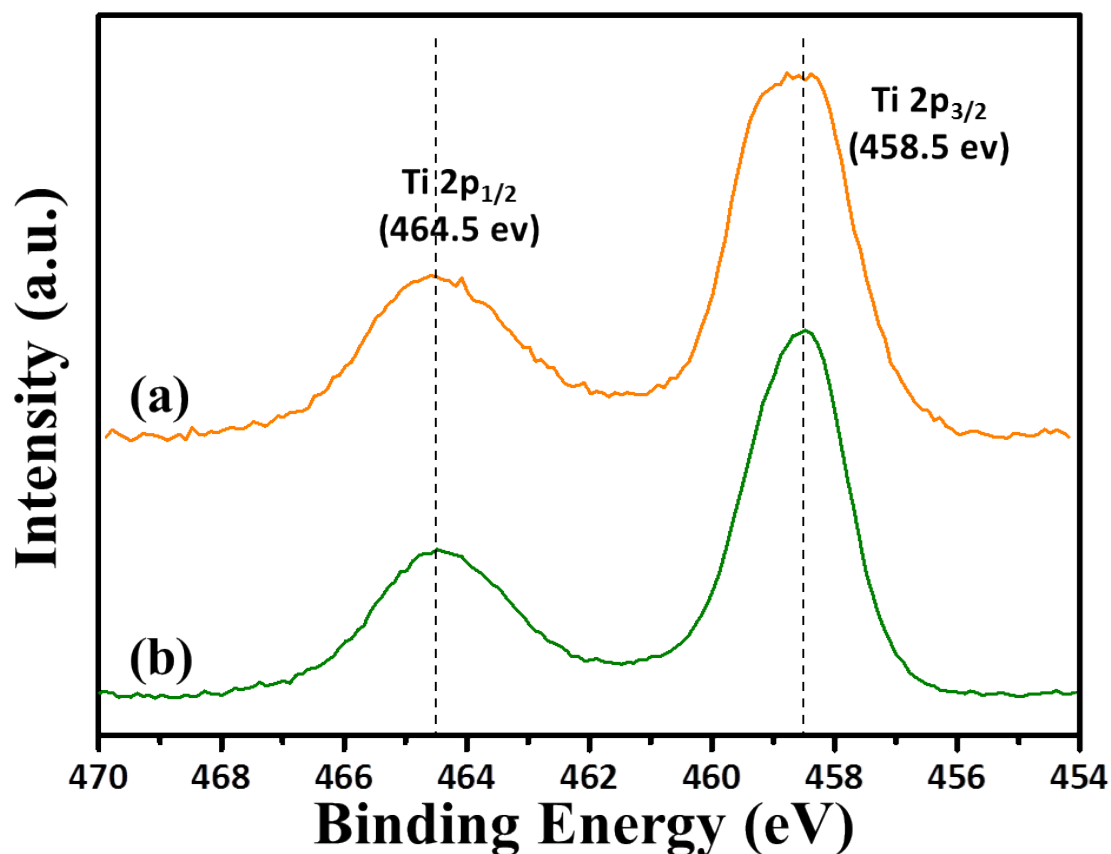

**Figure S7.** XPS Ti 2p spectra of the (a) Li-Ti-P-O/partially reduced GO precursor and (b)  $\text{LiTi}_2(\text{PO}_4)_3/\text{rGO}$  nanocomposite, which indicates before and after calcination. As shown in Fig. S7, there are two pairs of Ti 2p peaks with binding energies of 458.5 eV and 464.5 eV, attributed to Ti 2p<sub>3/2</sub> and Ti 2p<sub>1/2</sub>, respectively, which typically  $\text{Ti}^{4+}$  in an octahedral environment.<sup>8,9</sup> As shown in Fig. S7(b), the Ti 2p signals of the  $\text{LiTi}_2(\text{PO}_4)_3/\text{rGO}$  composite calcined under inert gas at 800 °C for 10 h only corresponding to  $\text{Ti}^{4+}$  and there are no peaks that belong to  $\text{Ti}^{3+}$ , similar to Fig. S7(a).

## References

1. V. Aravindan, W. Chuiling and S. Madhavi, *RSC Advances*, 2012, 2, 7534-7539.
2. J. Y. Luo and Y. Y. Xia, *Adv Funct Mater*, 2007, 17, 3877-3884.
3. M. Zhou, L. Liu, L. Yi, Z. Yang, S. Mao, Y. Zhou, T. Hu, Y. Yang, B. Shen and X. Wang, *Journal of Power Sources*, 2013, 234, 292-301.
4. L. Liu, M. Zhou, G. Wang, H. Guo, F. Tian and X. Wang, *Electrochimica Acta*, 2012, 70, 136-141.
5. I. D. Gimenez, I. O. Mazali and O. L. Alves, *J Phys Chem Solids*, 2001, 62, 1251-1255.
6. C. M. Burba and R. Frech, *Solid State Ionics*, 2006, 177, 1489-1494.
7. R. Ramaraghavulu and S. Buddhudu, *Ceram Int*, 2011, 37, 3651-3656.
8. J. C. Yu, L. Z. Zhang, Z. Zheng and J. C. Zhao, *Chem Mater*, 2003, 15, 2280-2286.
9. W. Y. Wu, T. W. Shih, P. Chen, J. M. Ting and J. M. Chen, *J Electrochem Soc*, 2011, 158, K101-K106.
